# Supplementary material for: Rational design of an anchoring peptide for high-efficiency and quantitative modification of peptides and DNA strands on gold nanoparticles
Source: Royal Society of Chemistry journal article supplement (doi:10.1039/c8nr03565b), 2018-01-01
Supplement: c8nr03565b1.pdf [file c8nr03565b1.pdf]

## Supporting Information

### Rational Design of an Anchoring Peptide for High-efficiency and Quantitative Modification of Peptides and DNAs on Gold Nanoparticles

Xin-Yi Li, Fu-Yan Feng, Xiao-Dong Zhou\*, Ji-Ming Hu\*

‡ Key Laboratory of Analytical Chemistry for Biology and Medicine (Ministry of Education),  
College of Chemistry and Molecular Sciences, Wuhan University, Wuhan 430072, PR China

#### Supporting Figures:

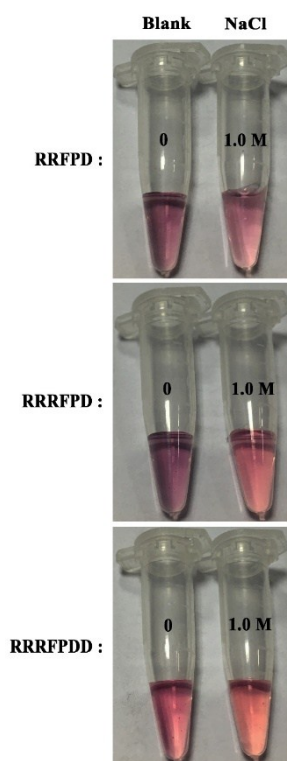

**Figure S1.** Photo images of AuNPs modified with different peptides (RRFPD, RRRFPD, RRRFPDD).

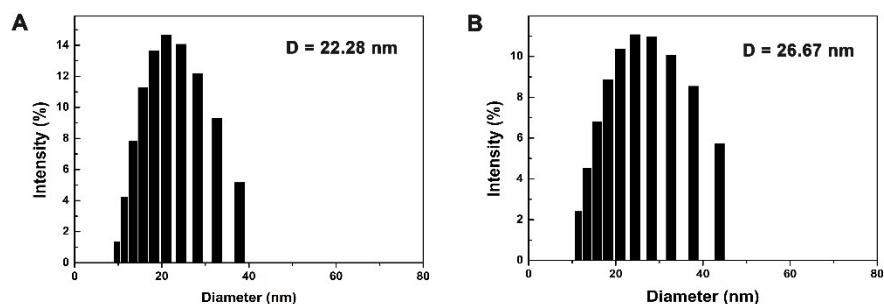

**Figure S2.** DLS measurements for hydrodynamic diameters of (A) 20 nm bare AuNPs and (B) 20 nm AuNPs capped with RRFPDD.

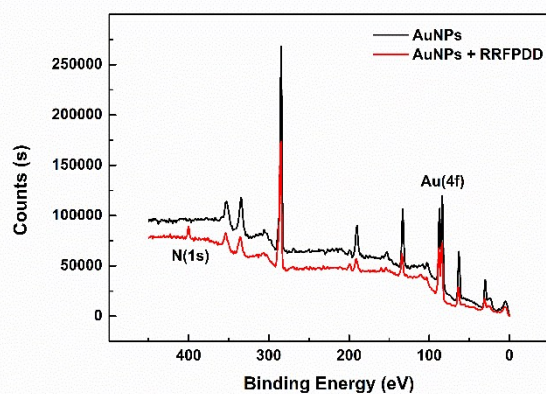

**Figure S3.** XPS spectra of bare AuNPs (black line) and the AuNPs capped with RRFPDD (red line).

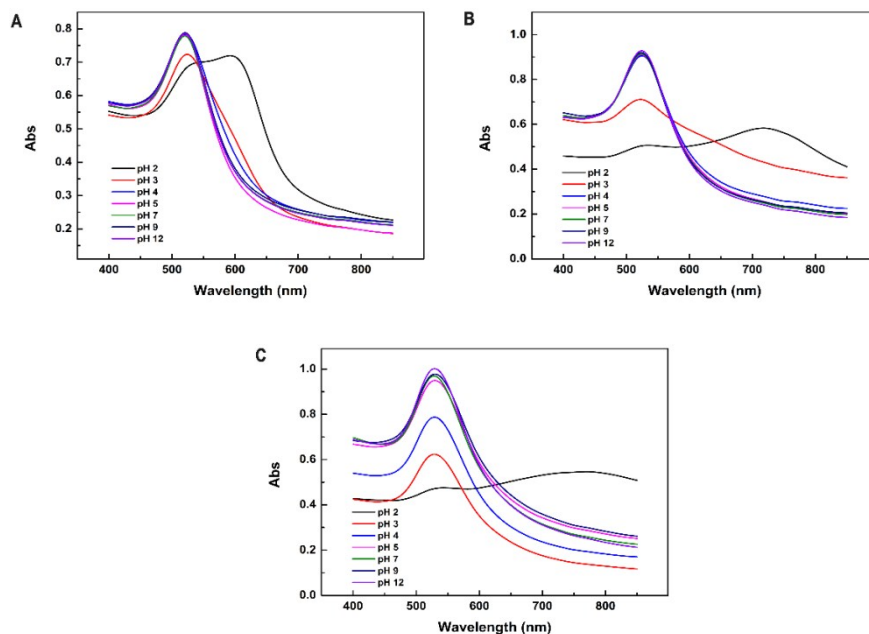

**Figure S4.** UV-vis spectra of RRFPDD-capped (A) 15 nm, (B) 20 nm, (C) 30 nm AuNPs at different pH ranging from 2 to 12.

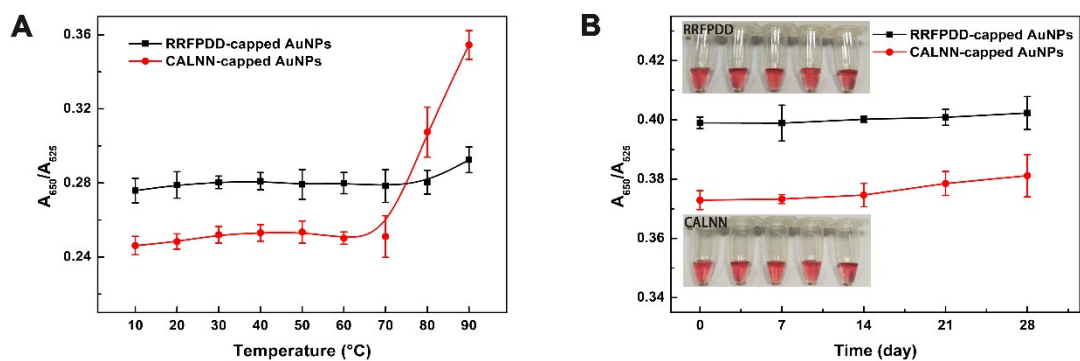

**Figure S5.** (A) Thermostability and (B) storage stability of RRFPDD-stabilized AuNPs (black line) and CALNN-stabilized AuNPs (red line).

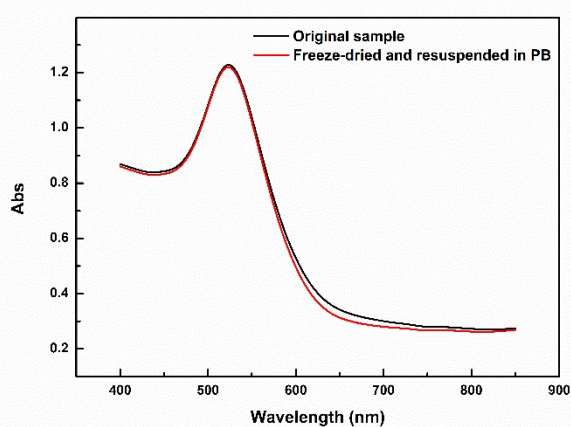

**Figure S6.** Absorption spectra of RRFPDD-capped AuNPs before and after freeze-drying.

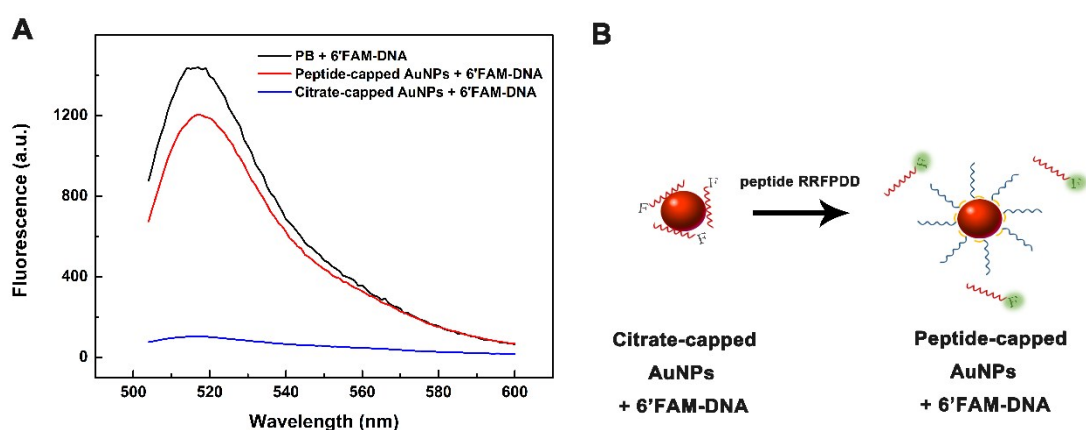

**Figure S7.** (A) Fluorescence intensity of FAM-DNA in PB buffer (black line), RRFPDD-capped AuNPs nanoconjugates (red line) and citrate-capped AuNPs (blue line) treated with FAM-DNA (1  $\mu$ M). (B) Schematic illustration of the nonspecific adsorption of AuNPs before and after adding the peptide RRFPDD.

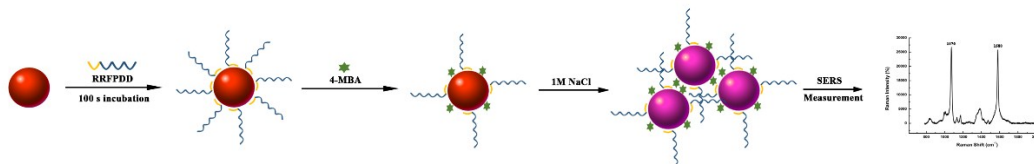

**Figure S8.** Schematic illustration of determining the SERS signals of 4-MBA based on the aggregation of RRFPDD-capped 20 nm AuNPs.

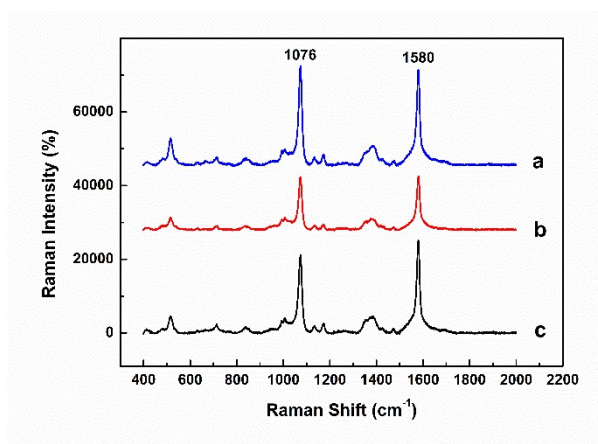

**Figure S9.** SERS spectra of (a) RRFPDD-AuNPs, (b) CALNN-AuNPs, (c) citrate-AuNPs. All of these nanoconjugates were modified with 4-MBA and the diameter of AuNPs was 20 nm.

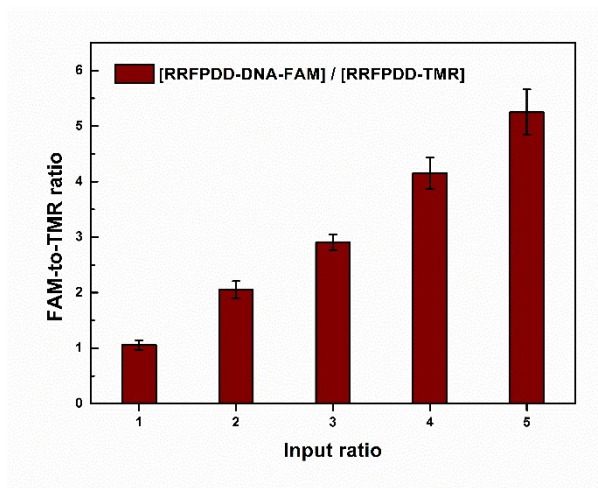

**Figure S10.** Loading ratio of RRFPDD-DNA-FAM (probe 5) and RRFPDD-TMR put in a certain proportion (1:1, 2:1, 3:1, 4:1, 5:1).

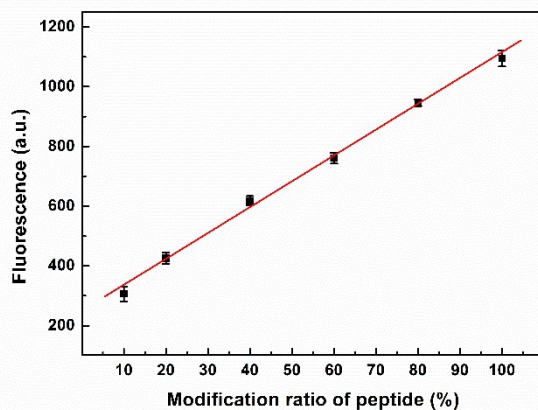

**Figure S11.** The standard curve of fluorescence intensity of RRFPPDD-(RD)<sub>8</sub>-FAM at different modification ratios.

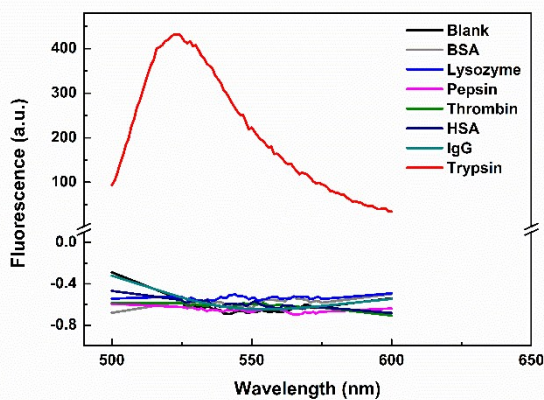

**Figure S12.** Specificity evaluation for the hydrolysis platform. The RRFPPDD-(RD)<sub>8</sub>-FAM capped AuNPs were treated with several enzymes (10  $\mu$ M) and trypsin (100 nM).

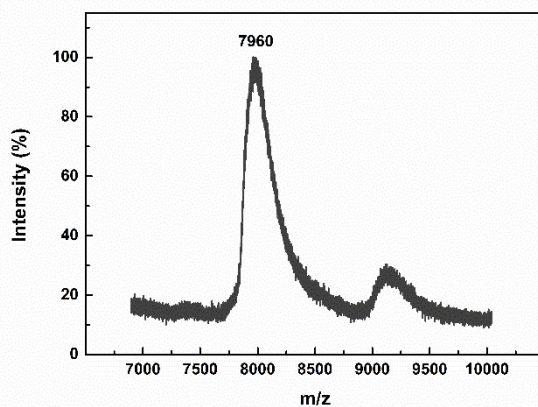

**Figure S13.** MALDI-TOF spectrum of probe 2 (RRFPDD-ATTACCACTTACTTCCGGA).

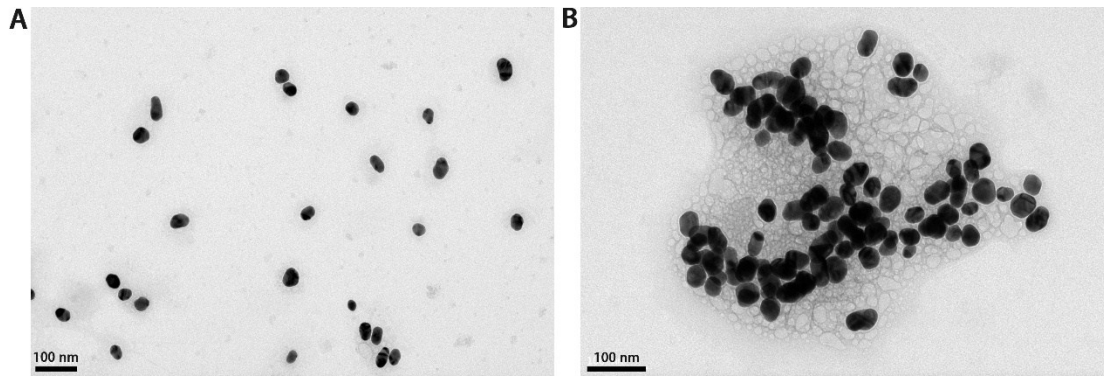

**Figure S14.** TEM images of peptide-capped 30 nm AuNPs in the (A) absence and (B) presence of 400 ng/mL cTnI. The peptide sequence is RRFPPDD-FYSHSFHENWPS.

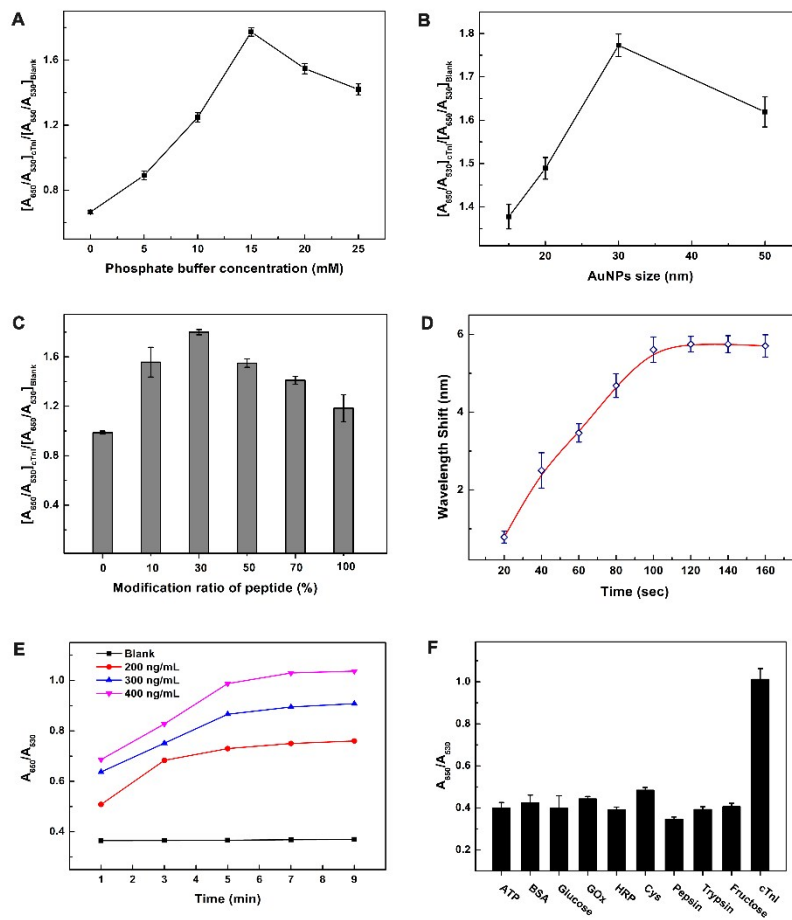

**Figure S15.** Effects of (A) the PB concentration, (B) the diameter of AuNPs, (C) the modification ratio, (D) the modification time of RRFPPDD-FYSHSFHENWPS and (E) the reaction time. In the measurements, 150 ng/mL cTnI and 30% modification ratio of peptides were used. (F) Selectivity of the detection platform. The error bars represent standard deviations based on three independent measurements.

## Supporting Tables:

**Table S1.** The determination of cTnI in human serum samples using the method. The data are given as the average value obtained from three independent experiments (n=3).

| Sample | Added cTnI (ng/mL) | Detected cTnI (ng/mL) | Recovery (%) | RSD (%) |
|--------|--------------------|-----------------------|--------------|---------|
| 1      | 100                | 102.65                | 102.66       | 2.83    |
| 2      | 300                | 296.09                | 98.70        | 4.08    |
| 3      | 500                | 495.47                | 99.09        | 3.53    |

**Table S2.** Comparison of our anchor RRFPPD with the traditional CALNN.

|                                   | RRFPDD                   | CALNN           |
|-----------------------------------|--------------------------|-----------------|
| Binding force                     | Electrostatic attraction | Au-N bonds      |
| Peptide consumption               | 50 $\mu$ M               | 1.38 mM         |
| Modification time                 | 100 s                    | Overnight       |
| Non-specific adsorption           | Inhibitive               | Uncertain       |
| Further functionalization (4-MBA) | Beneficial               | Profitless      |
| Hydrolysis efficiency             | 85%                      | 53%             |
| Hydrolysis time                   | 30 min                   | 60 min          |
| Quantitative modification         | √                        | √               |
| Freeze-drying                     | √                        | √               |
| Stability                         | Salt-tolerance           | Salt-tolerance  |
|                                   | pH-tolerance             | pH-tolerance    |
|                                   | heat-resisting           | frost-resisting |
|                                   | frost-resisting          |                 |

**Table S3.** List of peptide sequences.

| <b>Substitution<br/>in positions 1<br/>and 2</b> | <b>Ratio of<br/>alkaline AA to<br/>acidic AA</b> | <b>Substitution<br/>in positions 3<br/>and 4</b> | <b>Terminal modification</b>               |
|--------------------------------------------------|--------------------------------------------------|--------------------------------------------------|--------------------------------------------|
| RRFPDD-FAM                                       | RFPD                                             | RRAFDD                                           | RRFPDD-V <sub>4</sub> -FAM <sup>a</sup>    |
| KKFPDD-FAM                                       | RFPDD                                            | RRAIDD                                           | RRFPDD-S <sub>4</sub> -TMR <sup>a</sup>    |
| HHFPDD-FAM                                       | RFPDDD                                           | RRALDD                                           | RRFPDD-TMR                                 |
|                                                  | RFPDDDD                                          | RRAPDD                                           | RRFPDD-(RD) <sub>8</sub> -FAM <sup>a</sup> |
|                                                  | RRFPD                                            | RRAVDD                                           | CALNN-(RD) <sub>8</sub> -FAM <sup>a</sup>  |
|                                                  | RRFPDD                                           | RRFLDD                                           | RRFPDD-FYSHSFHENWPS                        |
|                                                  | RRFPDDD                                          | RRFPDD                                           | CALNN-TMR                                  |
|                                                  | RRRFPD                                           | RRILDD                                           |                                            |
|                                                  | RRRFPDD                                          | RRLADD                                           |                                            |
|                                                  |                                                  | RRVLDD                                           |                                            |
|                                                  |                                                  | RRDD                                             |                                            |

<sup>a</sup>. The RRFPPDD-VVVV, RRFPPDD-SSSS, RRFPPDD-RCFRGGDD and CALNN-RCFRGGDD are abbreviated as RRFPPDD-V<sub>4</sub>, RRFPPDD-S<sub>4</sub>, RRFPPDD-(RD)<sub>8</sub>, CALNN-(RD)<sub>8</sub>, respectively.

**Table S4.** List of DNA sequences.

| <b>The ssDNA</b> | <b>Sequence (5' to 3')</b>            |
|------------------|---------------------------------------|
| Probe 1          | ATTACCCTTACTT-FAM                     |
| Probe 2          | RRFPDD-ATTACCCTTACTTCCGGA             |
| Probe 3          | HS-PEG-CTCACCTCACTCCCCT               |
| Probe 4          | GAGTGGAGTGAGGGTGATCCGGAAGTAAGTGGTAAAT |
| Probe 5          | RRFPDD-ATTACCCTTACTTCCGGA-FAM         |
